# Supplementary material for: Biodegradation of Poly (Butylene Succinate) (PBS)/Stearate Modified Magnesium-Aluminium Layered Double Hydroxide Composites under Marine Conditions Prepared via Melt Compounding
Source: PubMed Central journal article supplement (PMC7730599; doi:10.3390/molecules25235766), 2020-12-07
Supplement: molecules-25-05766-s001.pdf [file molecules-25-05766-s001.pdf]

## SUPPORTING INFORMATION

# Biodegradation of Poly (Butylene Succinate) (PBS)/ Stearate Modified Magnesium-Aluminium Layered Double Hydroxide Composites under Marine Conditions Prepared via Melt Compounding

Parameswaran Shaiju <sup>1</sup>, Benamor-Bois Dorian <sup>2</sup>, Ramsankar Senthamarai Kannan <sup>2</sup> and  
Ramesh Babu Padamati <sup>1,2,\*</sup>

<sup>1</sup> BiOrbic, Bioeconomy Research Centre, University College Dublin, Belfield, Dublin D04 V1W8, Ireland; sparames@tcd.ie

<sup>2</sup> AMBER Centre, CRANN Institute, School of Physics, Trinity College Dublin, Dublin D02 PN40, Ireland; d.benamorbais@gmail.com (B.-B.D.); ramsankar.s@tcd.ie (R.S.)

\* Correspondence: babup@tcd.ie; Tel.: +353-18962602

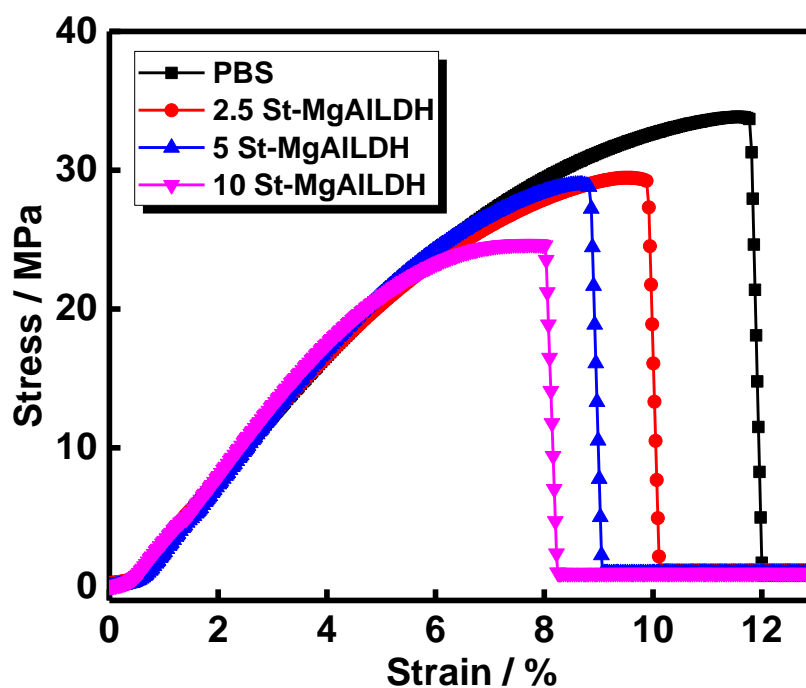

Figure S1. Stress vs. strain curves of PBS and PBS/ St-Mg-Al LDH composites.

**Table S1.** Variation in the percentage of crystallinity obtained for pure PBS and PBS composites.

| Samples              | Crystallinity (%) |
|----------------------|-------------------|
| PBS                  | 48.0              |
| PBS/2.5 St-Mg-Al LDH | 48.5              |
| PBS/5 St-Mg-Al LDH   | 47.5              |
| PBS/10 St-Mg-Al LDH  | 48.7              |

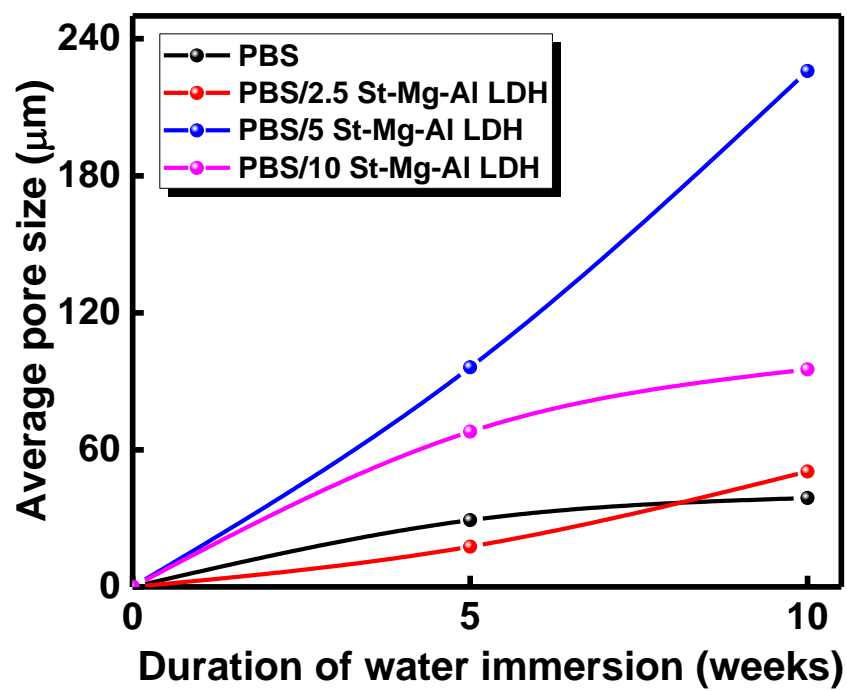

**Figure S2.** The average pore sizes of PBS and PBS/ St-Mg-Al LDH composites calculated from SEM.

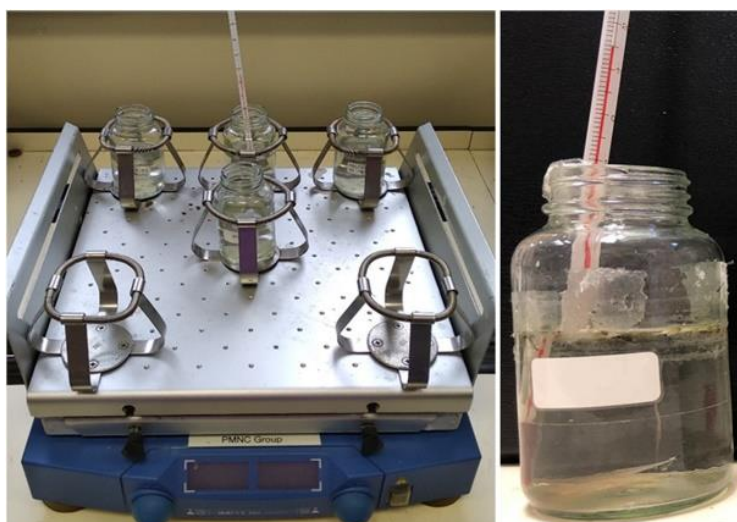

**Figure S3.** The experimental setup used for the degradation study of PBS composite films in water.

**Table S2.** Variation in the weight obtained for pure PBS and PBS composites after seawater immersion.

| Duration of water immersion | Weight of the sample (mg) |                    |                  |                   |
|-----------------------------|---------------------------|--------------------|------------------|-------------------|
|                             | PBS                       | PBS/2.5 St-MgAILDH | PBS/5 St-MgAILDH | PBS/10 St-MgAILDH |
| 0 weeks                     | 52.4                      | 53.4               | 50.9             | 50.9              |
| 2 weeks                     | 51.8                      | 52.42              | 48.2             | 48.8              |
| 4 weeks                     | 51.46                     | 51.7               | 46.72            | 47.2              |
| 6 weeks                     | 51.29                     | 51.42              | 45.69            | 46.26             |
| 8 weeks                     | 50.76                     | 50.83              | 43.98            | 45.28             |
| 10 weeks                    | 50.6                      | 50                 | 42.88            | 43.8              |
